# Supplementary material for: Efficient electrochemical CO2 conversion by cobalt-based metal organic frameworks modified by bimetallic gold–silver nanostructures
Source: Royal Society of Chemistry journal article supplement (doi:10.1039/d3cy00373f), 2023-01-01
Supplement: d3cy00373f1.pdf [file d3cy00373f1.pdf]

*Supporting Information*

**Efficient Electrochemical CO<sub>2</sub> Conversion by Cobalt-Based Metal Organic Frameworks Modified by Bimetallic Gold-Silver Nanostructures**

Mohammadali Beheshti<sup>a</sup>, Mohsen Saeidi<sup>a</sup>, MahsaSadat Adel Rastkhiz<sup>a</sup>, Shohreh Shahrestani<sup>b</sup>, Ali Zarrabi<sup>c</sup>, Jing Bai<sup>d</sup>, Abdolreza Simchi<sup>a,e†</sup>, Samineh Akbarmolaei<sup>a</sup>

<sup>a</sup> Department of Materials Science and Engineering, Sharif University of Technology, Tehran 1458889694, Iran

<sup>b</sup> Centre for Corrosion Research, Mechanical Engineering Department, Universiti Teknologi PETRONAS, Seri Iskandar 32610, Malaysia

<sup>c</sup> Biomedical Engineering Department, Faculty of Engineering and Natural Sciences, Istinye University, Istanbul 34396, Turkey

<sup>d</sup> *School of Environmental Science and Engineering, Key Laboratory of Thin Film and Microfabrication Technology (Ministry of Education), Shanghai Jiao Tong University, Shanghai200240, P. R. China*

<sup>e</sup> Institute for Nanoscience and Nanotechnology, Sharif University of Technology, Tehran 14588, Iran

† Corresponding author: Tel: +98-21-6616 5226. E-mail: Simchi@sharif.edu

**List of content**

- S1. Materials and methods
- S2. Determination of particle size distribution of electrocatalysts
- S3. TEM and EDS analyses
- S4. XPS analysis
- S5. Electrochemical studies
  - S5.1. Electrochemical active surface area (ECAS)
- S6. Stability studies for CO<sub>2</sub> reduction reaction

## S1. Materials and methods

**Table S1.** Materials and process parameters used for CO<sub>2</sub>RR

|                     |                                                                                                                                                                  |
|---------------------|------------------------------------------------------------------------------------------------------------------------------------------------------------------|
| Anolyte             | 0.1 M H <sub>2</sub> SO <sub>4</sub>                                                                                                                             |
| Counter electrode   | Platinum                                                                                                                                                         |
| Reference electrode | Ag/AgCl                                                                                                                                                          |
| Working electrodes  | Ag@ZIF-67/GCE, Au@ZIF-67/GCE, and Au-Ag@ZIF-67/GCE                                                                                                               |
| Catholyte           | 0.1 M K <sub>2</sub> CO <sub>3</sub>                                                                                                                             |
| Cell type           | H-Shaped                                                                                                                                                         |
| Process             | Chronoamperometry (CA) @ -1 V vs. RHE<br>De-oxidation for 30 min with N <sub>2</sub> gas<br>Inlet CO <sub>2</sub> with a rate of 20 mL/min<br>Temperature: 25 °C |

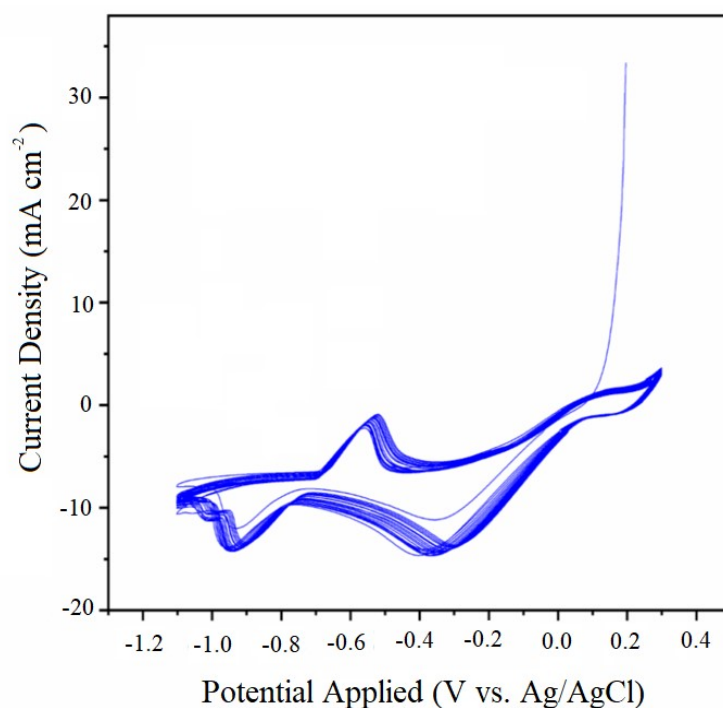

**Figure S1.** Cyclic voltammograms for electrodeposition of gold and silver nanoparticles on ZIF-67/GCE at a scan rate of 200 mV s<sup>-1</sup> for 15 cycles.

## S2. Determination of the particle size distribution of electrocatalysts

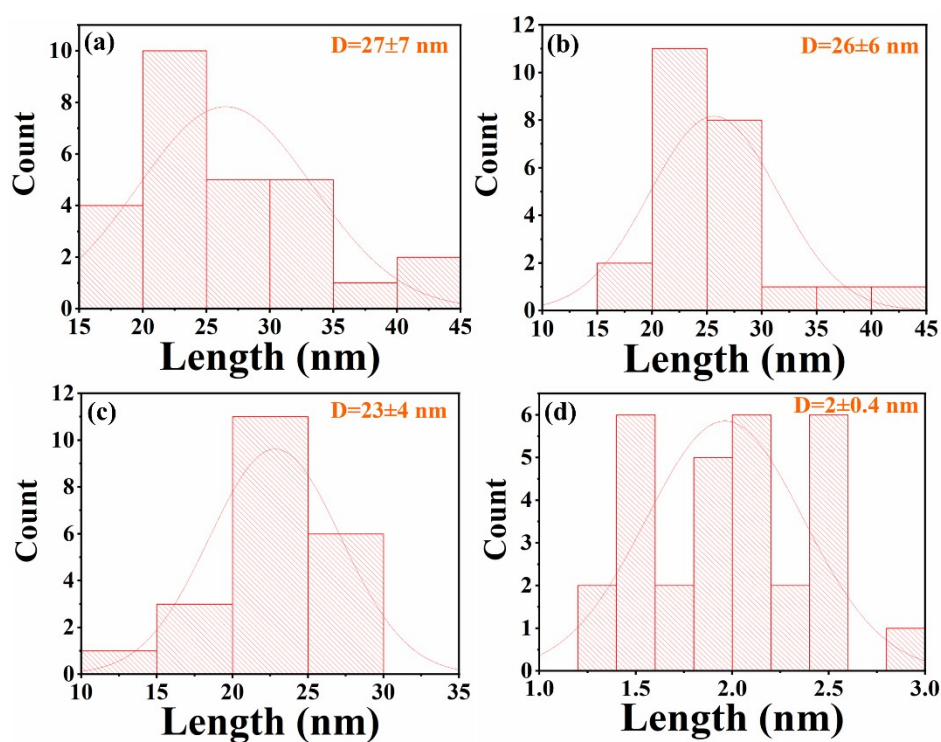

**Figure S2.** Particle size distribution of (a) Ag@ZIF-67, (b) Au@ZIF-67, and (c) Au-Ag@ZIF-67 electrocatalysts determined by FE-SEM. (d) Particle size distribution of Au-Ag@ZIF-67 determined by HRTEM.

### S3. TEM and EDS analyses

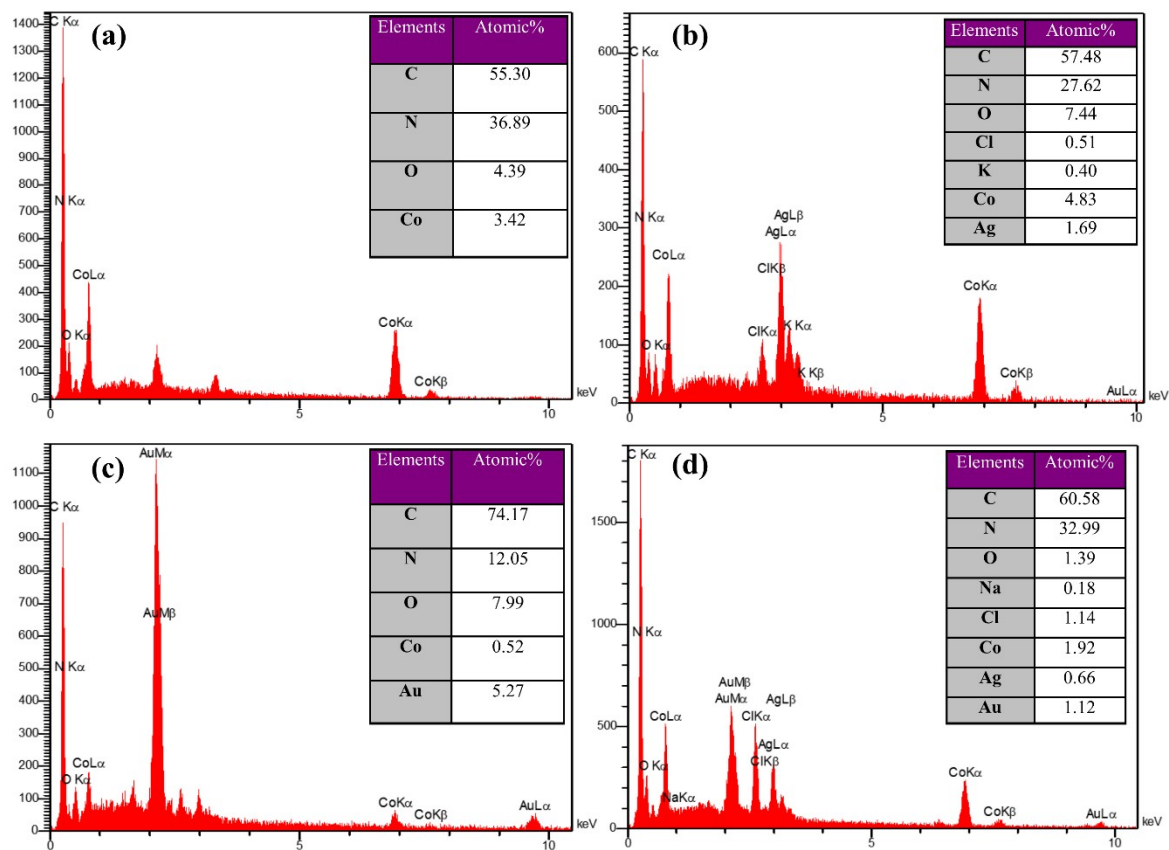

**Figure S3.** EDS spectra of (a) ZIF-67, (b) Ag@ZIF-67, (c) Au@ZIF-67 and (d) Au-Ag@ZIF-67.

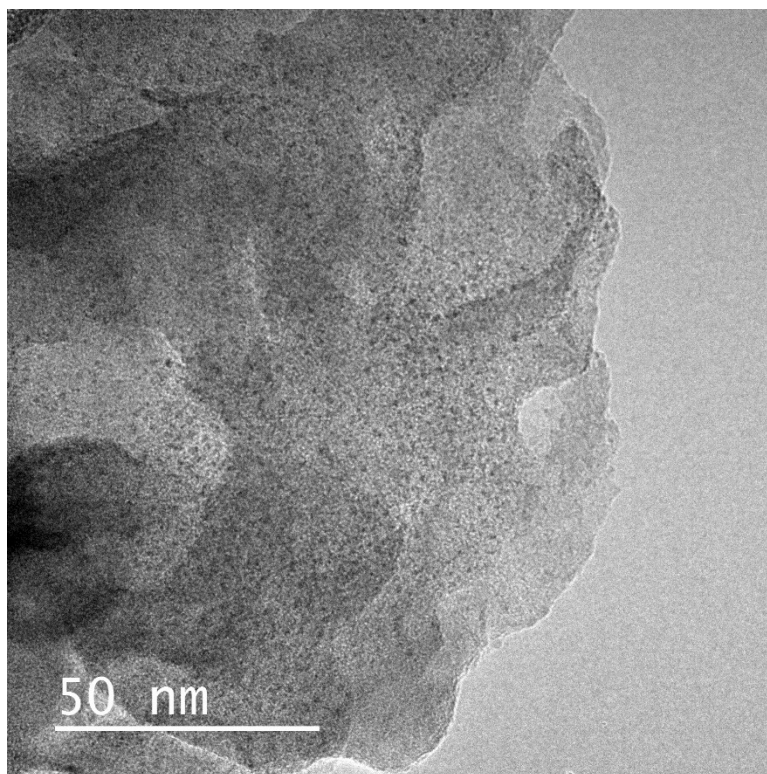

**Figure S4.** TEM image of Au-Ag@ZIF-67.

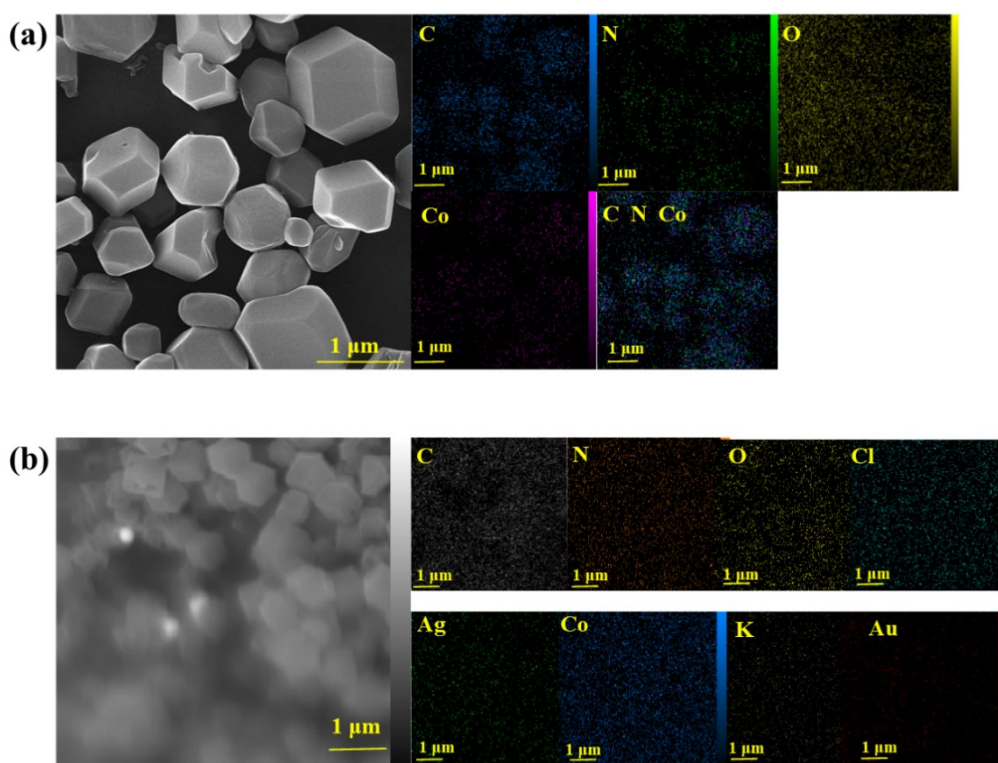

**Figure S5.** EDS mapping of (a) ZIF-67 and (b) Au-Ag@ZIF-67.

## S.4 XPS analysis

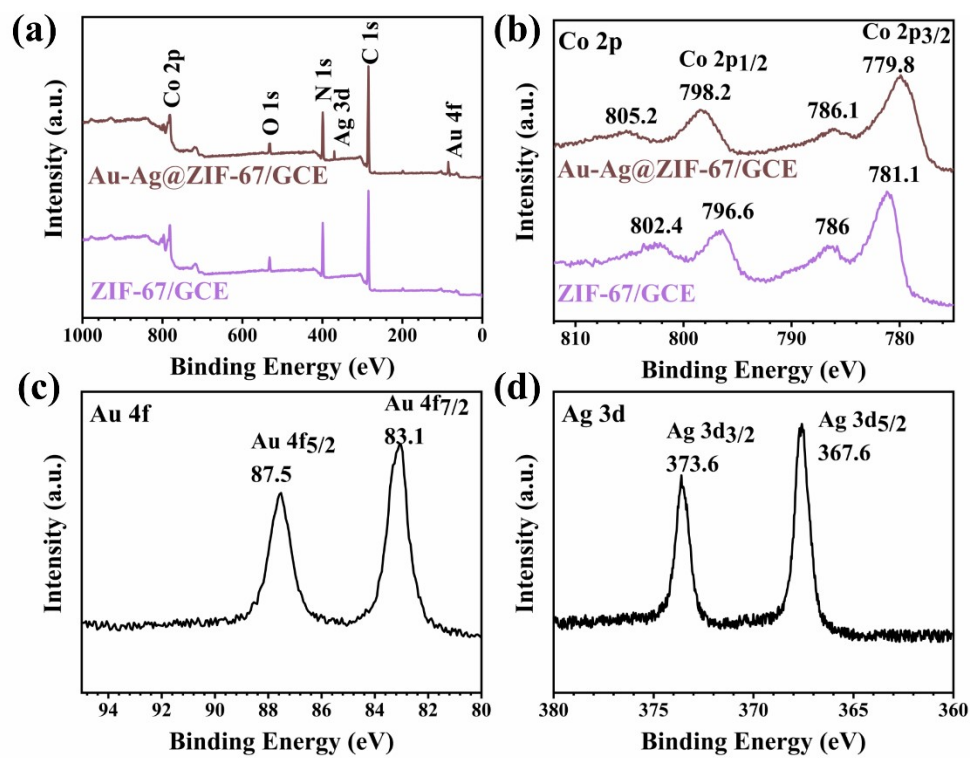

**Figure S6.** XPS spectra of (a) ZIF-67/GCE and Au-Ag@ ZIF-67/GCE, (b) Co 2p, (c) Au 4f and (d) Ag 3d.

## S5. Electrochemical studies

Table S2. Values of  $R_s$  and  $R_{ct}$  derived from ESI data fitting by an equivalent circuit

| Substrate        | $R_s$ ( $\Omega$ ) | $R_{ct}$ ( $\Omega$ ) |
|------------------|--------------------|-----------------------|
| GCE              | 32.4               | 193.3                 |
| ZIF-67/GCE       | 41.9               | 266.1                 |
| Ag/GCE           | 32.8               | 143.7                 |
| Au/GCE           | 38.6               | 16.4                  |
| Au-Ag/GCE        | 33.2               | 35.1                  |
| Ag@ZIF-67/GCE    | 22.4               | 189.3                 |
| Au@ZIF-67/GCE    | 22.9               | 1.5                   |
| Au-Ag@ZIF-67/GCE | 18.6               | 0.14                  |

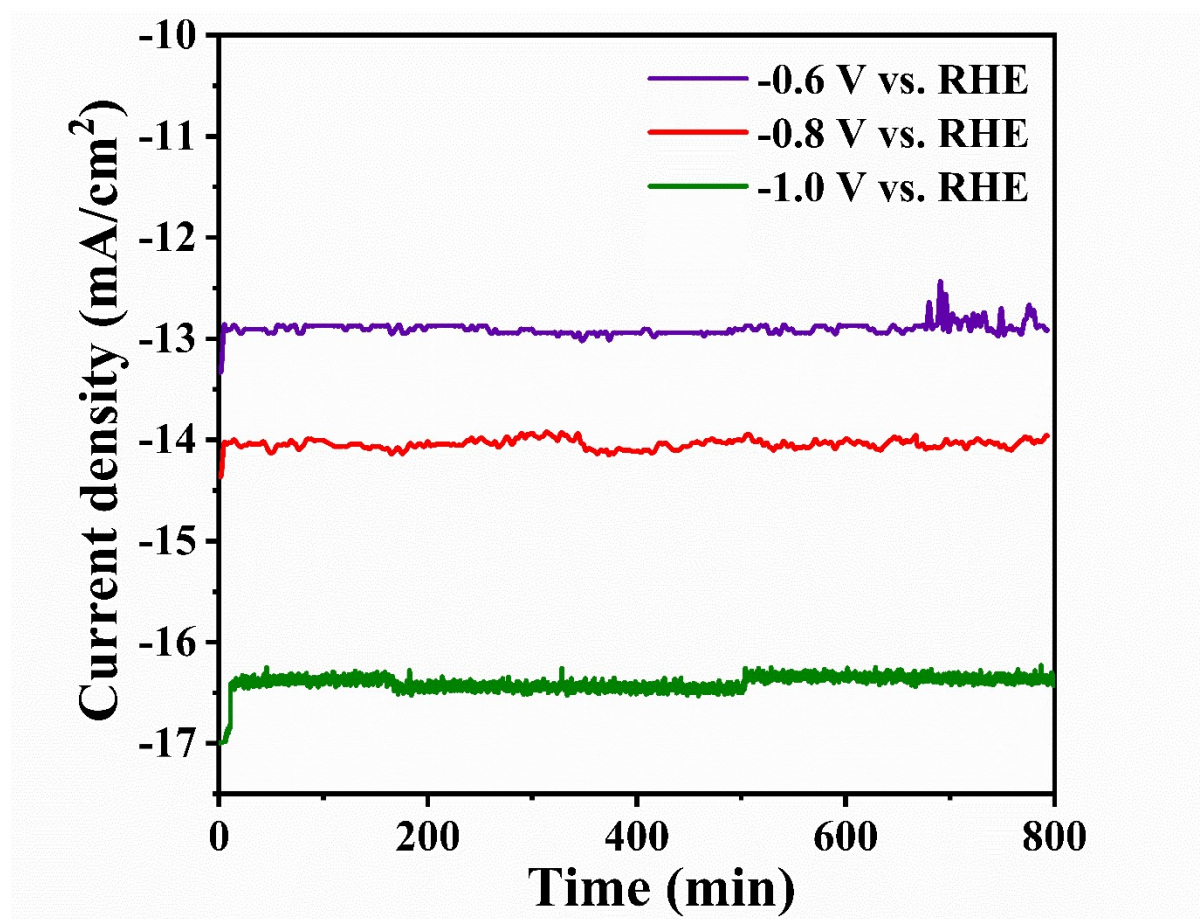

Figure S7. Amperometric studies as a function of time at the potentials of -0.6, -0.8, and -1 V (vs. RHE) showing the stability of the Au-Ag@ZIF-67 catalyst for CO<sub>2</sub>RR

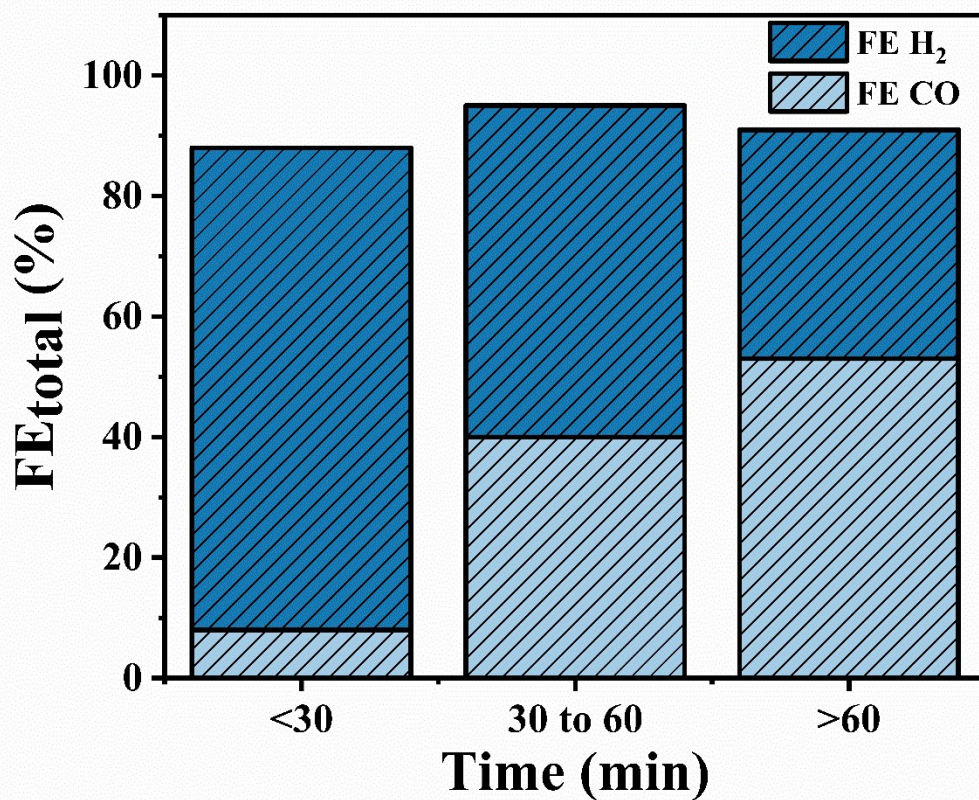

**Figure S8.** Time-dependent Faradaic efficiencies of gas products on the Au-Ag@ZIF-67 catalyst at -1 V (vs. RHE) for CO<sub>2</sub>RR



### S5.1. Electrochemical active surface area (ECSA)

CV at multiple scan rates was performed in a solution of 5 mM  $\text{Fe}(\text{CN})_6^{3-/4-}$  containing 0.1 M KCl to determine (ECSA). The Randles-Sevcik plot derived from CV curves is shown in Figure S5, and the value of ECSA was calculated by<sup>1</sup>:

$$I_p = (2.69 \times 10^5) n^{\frac{3}{2}} A D^{\frac{1}{2}} \nu^{\frac{1}{2}} C_0 \quad (\text{S1})$$

where  $I_p$  is the peak current (A),  $n$  is the number of the electrons participating in the reaction,  $A$  is the surface area of the electrode ( $\text{cm}^2$ ),  $D$  is the diffusion coefficient of the electroactive species ( $\text{cm}^2 \text{ s}^{-1}$ ),  $\nu$  is the scan rate ( $\text{V s}^{-1}$ ), and  $C_0$  is the concentration of the electroactive species in the bulk solution. Based on the slope of  $I_p$  vs.  $\nu^{1/2}$ , the ECSA was calculated for each electrode and shown in Table S3.

**Table S3.** The calculated values of ECSA

| Substrate        | Slope | Electroactive area ( $\text{cm}^2$ ) |
|------------------|-------|--------------------------------------|
| GCE              | 0.19  | 0.054                                |
| ZIF-67/GCE       | 0.17  | 0.04                                 |
| Ag/GCE           | 0.28  | 0.08                                 |
| Au/GCE           | 0.3   | 0.083                                |
| Au-Ag/GCE        | 0.26  | 0.074                                |
| Ag@ZIF-67/GCE    | 0.46  | 0.13                                 |
| Au@ZIF-67/GCE    | 0.54  | 0.15                                 |
| Au-Ag@ZIF-67/GCE | 0.63  | 0.18                                 |

**Table S4.** The extracted data from LSV curves of electrochemical CO<sub>2</sub>RR

| <b>Substrate</b> | <b>Overpotential at -10<br/>mA (vs. RHE)</b> | <b>Current at -1 V (vs. RHE)<br/>(mA)</b> |
|------------------|----------------------------------------------|-------------------------------------------|
| GCE              | -                                            | -1.54                                     |
| ZIF-67/GCE       | -                                            | -0.7                                      |
| Ag@ZIF-67/GCE    | -0.63                                        | -12.29                                    |
| Au@ZIF-67/GCE    | -0.58                                        | -12.69                                    |
| Au-Ag@ZIF-67/GCE | -0.54                                        | -16.4                                     |

## S6. Stability studies for CO<sub>2</sub> reduction reaction

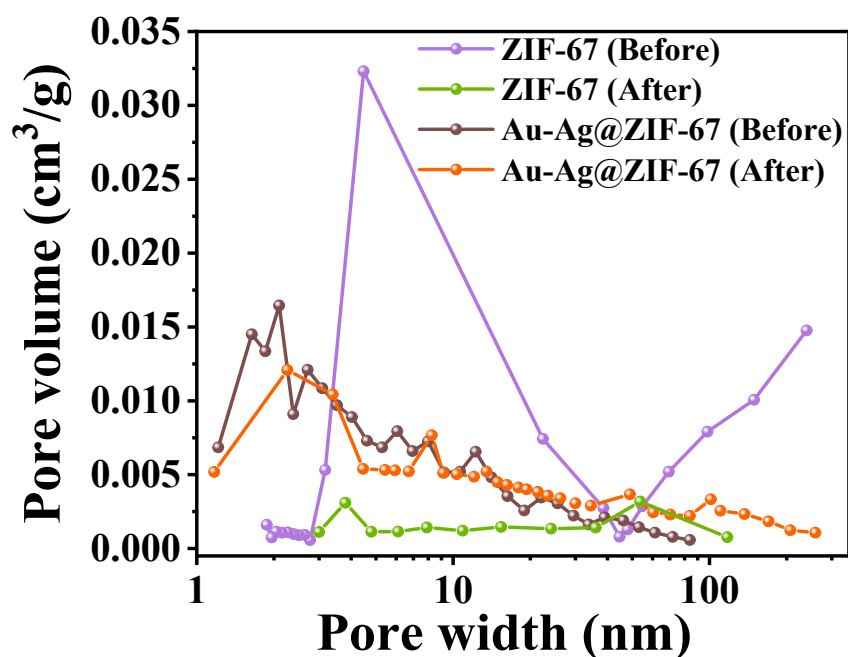

Figure S9. BJH pore size distribution.

Table S5. N<sub>2</sub> adsorption/desorption data for the synthesized samples

| Sample                                           | S <sub>BET</sub><br>(m <sup>2</sup> g <sup>-1</sup> ) | S <sub>ext</sub><br>(m <sup>2</sup> g <sup>-1</sup> ) | S <sub>micro</sub><br>(m <sup>2</sup> g <sup>-1</sup> ) | V <sub>micro</sub><br>(cm <sup>3</sup> g <sup>-1</sup> ) | V <sub>total</sub><br>(cm <sup>3</sup> g <sup>-1</sup> ) | Mean pore<br>width (nm) |
|--------------------------------------------------|-------------------------------------------------------|-------------------------------------------------------|---------------------------------------------------------|----------------------------------------------------------|----------------------------------------------------------|-------------------------|
| ZIF-67 before CO <sub>2</sub><br>reduction       | 1705.1                                                | 17.8                                                  | 1755.7                                                  | 0.613                                                    | 0.667                                                    | 7.2                     |
| ZIF-67 after CO <sub>2</sub><br>reduction        | 196.4                                                 | 4.1                                                   | 204.8                                                   | 0.092                                                    | 0.104                                                    | 10.9                    |
| Au-Ag@ZIF-67<br>before CO <sub>2</sub> reduction | 1072.5                                                | 55.6                                                  | 1016.9                                                  | 0.510                                                    | 0.560                                                    | 5.7                     |
| Au-Ag@ZIF-67 after<br>CO <sub>2</sub> reduction  | 985.3                                                 | 43.2                                                  | 940.1                                                   | 0.49                                                     | 0.546                                                    | 6.2                     |

## References

- 1 A. J. Bard, L. R. Faulkner and H. S. White, in *Electrochemical Methods: Fundamentals and Applications*, John Wiley & Sons, Ltd, New Jersey, 3rd edn., 2022, p. 316.
